# Supplementary material for: WAVE2 Is a Vital Regulator in Myogenic Differentiation of Progenitor Cells through the Mechanosensitive MRTFA–SRF Axis
Source: MDPI journal article supplement (doi:10.3390/cells13010009), 2023-12-20
Supplement: s1 [file s1]

**Table S1. Oligonucleotide sequences for transfection**

| Gene                | Oligonucleotide sequence (5'-3') |
|---------------------|----------------------------------|
| scRNA (control RNA) | UCACAACCUCCUAGAAAGAGUAGA         |
| siWAVE2-1           | AAGTGCCTTTGCCTCCCGAGT            |
| siWAVE2-2           | CUGGAAUGCAGGACCAAC               |

**Table S2. Primer lists and conditions for *q*RT-PCR**

| Gene      | Primer sequence (5'-3') |                         | Product size | Annealing Temperature | Concentration |        | Cycle |
|-----------|-------------------------|-------------------------|--------------|-----------------------|---------------|--------|-------|
|           |                         |                         |              |                       | cDNA          | Primer |       |
| U6        | F.P                     | CTCGCTTCGGCAGCACA       | 100          | 58                    | 2 ng/μl       | 0.5 μM | 40    |
|           | R.P                     | AACGCTTCACGAATTTGCGT    |              |                       |               |        |       |
| PCNA      | F.P                     | GAACCTGCAGAGCATGGACTC   | 201          | 58                    |               |        |       |
|           | R.P                     | GGTGTCTGCATTATCTTCAGCCC |              |                       |               |        |       |
| Cyclin D1 | F.P                     | ACCAATCTCCTCAACGACCG    | 228          | 58                    |               |        |       |
|           | R.P                     | ACGGAAGGGAAGAGAAGGG     |              |                       |               |        |       |
| Cyclin B1 | F.P                     | GAGCTATCCTCATTGACTGG    | 125          | 58                    |               |        |       |
|           | R.P                     | CATCTTCTTGGGCACACAAC    |              |                       |               |        |       |
| SRF       | F.P                     | CTACACGACCTTCAGCAAGAG   | 141          | 58                    |               |        |       |
|           | R.P                     | GTATACACATGGCCTGTCTCAC  |              |                       |               |        |       |
| Vinculin  | F.P                     | ACCTGCAGACCAAAACCAAC    | 143          | 58                    |               |        |       |
|           | R.P                     | CTTACCGACTCCACGGTCAT    |              |                       |               |        |       |
| SMYD1     | F.P                     | GCATCTTCCCCAACCTGGGCCT  | 129          | 58                    |               |        |       |
|           | R.P                     | GGGCCCCGGAGCTCAATCCTCAT |              |                       |               |        |       |

**Table S3. Primer lists for promotor cloning**

| Gene                   | Primer sequence (5'-3') |                            | Product size | Annealing Temperature | Concentration |        | Cycle |
|------------------------|-------------------------|----------------------------|--------------|-----------------------|---------------|--------|-------|
|                        |                         |                            |              |                       | cDNA          | Primer |       |
| SMYD1 promoter (mouse) | F.P                     | AAACTCGAGTTAGCAGAATCCGCAAG | 969          | 58                    | 2 ng/μl       | 0.5 μM | 40    |
|                        | R.P                     | AAAAAGCTTTCAGAGTCTGTCAGGCC |              |                       |               |        |       |

**Table S4. Antibodies list**

| Antibody                              | Type       | Targeted species | Manufacturer                                | Cat. No.  | Dilution ratio* |
|---------------------------------------|------------|------------------|---------------------------------------------|-----------|-----------------|
| WAVE2                                 | Monoclonal | Rabbit           | Cell Signaling Technology, Danvers, MA, USA | D2C8      | 1:10,000        |
| MyHC                                  | Monoclonal | Mouse            | DSHB, Iowa, IA, USA                         | MF20      | 1:1,000         |
| MyoD                                  | Monoclonal | Mouse            | Santa Cruz Biotechnology, Dallas, TX, USA   | sc-377460 | 1:1,000         |
| MyoG                                  | Monoclonal | Mouse            | Santa Cruz Biotechnology, Dallas, TX, USA   | sc-12732  | 1:1,000         |
| SRF                                   | Monoclonal | Rabbit           | Cell Signaling Technology, Danvers, MA, USA | D71A9     | 1:10,000        |
| MRTFA                                 | Polyclonal | Rabbit           | ABclonal, Woburn, MA, USA                   | A8504     | 1:10,000        |
| Lamin B2                              | Monoclonal | Rabbit           | Abcam, Cambridge, United Kingdom            | ab151735  | 1:2,500         |
| α-Tubulin                             | Monoclonal | Mouse            | DSHB, Iowa, IA, USA                         | 12G10     | 1:2,000         |
| β-Actin                               | Monoclonal | Rabbit           | Sigma-Aldrich Chemical, St. Louis, USA      | A2066     | 1:10,000        |
| Antibodies HRP-linked anti-rabbit IgG |            |                  | Cell Signaling Technology, Danvers, MA, USA | #7074     | 1:10,000        |
| Goat anti-mouse(H+L)                  |            |                  | Thermofisher Sci., Waltham, MA, USA         | #32430    | 1:2,000         |

\*All blots were visualized using a Femto reagent (Thermofisher Scientific).
